# Supplementary material for: RETRACTED ARTICLE: Stimulus-triggered fate conversion of somatic cells into pluripotency
Source: Springer Nature journal article supplement (doi:10.1038/nature12968), 2014-01-28
Supplement: 41586_2014_BFnature12968_MOESM80_ESM.pdf [file 41586_2014_BFnature12968_MOESM80_ESM.pdf]

## Supplementary Table

### Primer sequence

| Gene      | 5' Primer                     | 3' Primer                       |
|-----------|-------------------------------|---------------------------------|
| Ecat1     | tgtggggccctgaaaggcgagctgagat  | atgggcccgcatacgcagcgcctcaact    |
| Esg1      | gaagtctggttcctggcaggatg       | actcgatacactggcctagc            |
| ERas      | actgccctcatcagactgctact       | cactgcctgtactcgggtagctg         |
| Gdf3      | gttccaacctgtgcctcgcgtctt      | agcgaggcatggagagagcggagcag      |
| Fgf4      | cggtgtgagcatctcggagtgg        | ccttctggccgcccgttcta            |
| Cripto    | atggacgcaactgtgaacatgatgtcgca | ctttgaggctcctgggccatcacgtgaccat |
| Dax1      | tgctcgggtccaggccatcaagag      | gggcactgttcagttcagcggatc        |
| Sox2      | aagggttcttgctgggtttt          | agaccacgaaaacggctctg            |
| Oct3/4    | aagccctccctacagcagat          | ctgggaaagggtgccctgta            |
| Rex1      | acgagtggcagtttcttctggga       | tatgactcactccagggggcact         |
| Klf4      | gcgaactcacacaggcgagaaacc      | tcgcttcttctcctccgacaca          |
| Klf5      | caagccgttccagtgcac            | gtctgcggtttaaggatgg             |
| Nanog     | ccaggttcttcttcttcc            | ggtgagatggctcagtggat            |
| Tbx3      | aggagcgtgtctgtcaggtt          | gccattacctcccaatttt             |
| Esrrb     | tttctggaacccatggagag          | agccagcacctccttctaca            |
| Gapdh     | accacagtccatgccatcac          | tccaccaccctgttgctgta            |
| Klf2      | gcctgtgggttcgctataaa          | aaggaatggctcagccacatc           |
| Klf4      | ccagcaagtcagctgtgaa           | gggcattgtcaagttggatt            |
| GATA2     | acacaccacccgataccacctat       | cctagcccatggcagtcacatgc         |
| Flk1      | ccagtggactggcagctaga          | gca tacgggctgtttgg              |
| Tal1      | ggtctagccgtactgg              | caataaagagtcacacgcc             |
| Claudin7  | gcgacaacatcatcacagcc          | cctggaggaattggacttg             |
| Sox17     | gagggccagaagcagtgta           | agtgattgtggggagcaagt            |
| GATA4     | ccctccctcttcaaatcc            | ctttccagagctccacctg             |
| Brachyury | aactctcacgatgtaatccg          | gcaaagtcaaactaccaaca            |
| ZO1       | agctgttctcctcattgctg          | gagatgttatgctggacggt            |
